# Supplementary material
Source: PubMed Central journal article supplement (PMC6137595)
Supplement: 778386_Supplemental_material.pdf [file 778386_Supplemental_material.pdf]

**eTable 1. Characteristics at celiac disease diagnosis in adults answering and not answering the study questionnaires.**

|                                                     | Questionnaires answered        |                                | P value      |
|-----------------------------------------------------|--------------------------------|--------------------------------|--------------|
|                                                     | Yes, n=237                     | No, n=322                      |              |
| Current age, median (IQR), years                    | 27.0 (22.0, 37.6)              | 25.9 (21.3, 34.7)              | 0.130        |
| Age at diagnosis, median (IQR), years               | 9.7 (5.3, 13.6)                | 10.1 (6.4, 13.0)               | 0.529        |
| Year of diagnosis, median (IQR)                     | 1998 (1986, 2004)              | 1999 (1990, 2005)              | 0.075        |
| Girls, No. (%)                                      | 164 (69.2)                     | 167 (51.9)                     | <0.001       |
| Main clinical presentation, No. (%)                 |                                |                                | 0.259        |
| Gastrointestinal                                    | 123 (52.1)                     | 142 (45.1)                     |              |
| Extra-intestinal                                    | 65 (27.5)                      | 98 (31.1)                      |              |
| Risk-group screening                                | 48 (20.3)                      | 75 (23.8)                      |              |
| Symptoms <sup>a</sup> , No. (%)                     | 172 (76.8)                     | 226 (75.6)                     | 0.750        |
| <b>In risk-group screened, No. (%)</b>              | <b>21 (44.7)</b>               | <b>43 (57.3)</b>               | <b>0.173</b> |
| Poor growth, No. (%)                                | 97 (44.7)                      | 115 (38.6)                     | 0.164        |
| Body mass index, median (IQR)                       | 16.5 (15.2, 18.4) <sup>c</sup> | 16.6 (15.4, 19.3) <sup>d</sup> | 0.264        |
| Anemia, No. (%)                                     | 63 (28.4)                      | 63 (23.2)                      | 0.194        |
| Hemoglobin, median (IQR), g/l                       | 124 (115, 131) <sup>e</sup>    | 127 (118, 134) <sup>f</sup>    | 0.051        |
| Severity of villous atrophy, No. (%)                |                                |                                | 0.766        |
| Partial                                             | 67 (31.5)                      | 98 (33.6)                      |              |
| Subtotal                                            | 84 (39.4)                      | 106 (36.3)                     |              |
| Total                                               | 62 (29.1)                      | 88 (30.1)                      |              |
| Type 1 diabetes, No. (%)                            | 16 (8.8)                       | 40 (15.9)                      | 0.029        |
| Celiac disease in the family <sup>b</sup> , No. (%) | 75 (56.0) <sup>g</sup>         | 87 (44.2) <sup>h</sup>         | 0.035        |

<sup>a</sup> Asymptomatic signs such as poor growth, anemia and other laboratory abnormalities excluded; <sup>b</sup> First degree relatives; <sup>c-h</sup> Data available only from <sup>c</sup> 160, <sup>d</sup> 223, <sup>e</sup> 190, <sup>f</sup> 223, <sup>g</sup> 134 and <sup>h</sup> 197 of patients. IQR, interquartile range.
